# Supplementary material for: Exploring the Mechanism of Dangguiliuhuang Decoction Against Hepatic Fibrosis by Network Pharmacology and Experimental Validation
Source: Front Pharmacol. 2018 Mar 5;9:187. doi: 10.3389/fphar.2018.00187 (PMC5844928; doi:10.3389/fphar.2018.00187)
Supplement: Supplementary file 5 [file Table_4.XLSX]

## Sheet: Sheet1
Gene primers applied to qRT-PCR analysis
Gene	Forward primer	Reverse primer
mCOL1A1	CTTAGACAGGGCAAAGAGTG	TCAAGACATAGGCGAGGG
mCyclinD1	CCTGGATGCTGGAGGTCTG	AGGTTCCACTTGAGCTTGTTC
mNF-κB	TCCATCGTGGAGCCTAAGGA	TCACAGCCATATCGAAATCTGAAG
mPPAR-γ	GTGCCAGTTTCGATCCGTAGA	GGCCAGCATCGTGTAGATGA
mTIMP1	GGCTAAATTCATGGGTTCCCCAG	CTCAGAGTACGCCAGGGAACCAAG
mMMP13	GCTGGTCAGTCGCCCTTTT	TAAGGAAAGCAGAGAGGGATTAACA
mα-SMA	AACGCCTTCCGCTGCCC	CGATGCCCGCTGACTCC
mIFN-γ	CTTTGCAGCTCTTCCTCATGGCTGTTTCTG	TGACGCTTATGTTGTTGCTGATGGCCTG
mIL-1β	CCAGCTTCAAATCTCACAGCAG	CTTCTTTGGGTATTGCTTGGGATC
mTGF-β1	CACTGATACGCCTGAGTG	GTGAGCGCTGAATCGAAA
mTNF-α	CACAGAAAGCATGATCCGCGACGT	CGGCAGAGAGGAGGTTGACTTTCT
mβ-actin	TGTGATGGTGGGAATGGGTCAG	TTTGATGTCACGCACGATTTCC
rTGF-β1	CCGAGAACACCCATAGAC	GACCCTTAGGCTTCAACA
rα-SMA	CTTTGCTGGTGATGATGC	GTGGGAATACGTTAGACTTGTA
rMMP13	GCAGTCTTTCTTTGGCTTAG	TTGTTTGGGACCATTTGA
rTIMP1	GGGCAGATGCTCAAAGGA	GAGGCAAGAAACCAACAGG
rCOL1A1	CTGGTCTTGGAGGAGTAAG	TCTCAAATGGTTGGGAAT
rNF-κB	CTGACCCCTGTCCTCTCGCATC	CTCCCAGCCAGGTCCCGTGA
rPPAR-γ	TAAAGTCCTTCCCGCTGACC	GATCGAAACTGGCACCCTT
rCyclinD1	GGCAGCCCCAACAACTTCC	ACTTCCCCTTCCTCCTCGGTG
rβ-actin	CTCATGCCATCCTGCGTCT	AAGTCTAGGGCAACATAGCAC
