# Supplementary material for: Exploring the Mechanism of Dangguiliuhuang Decoction Against Hepatic Fibrosis by Network Pharmacology and Experimental Validation
Source: Front Pharmacol. 2018 Mar 5;9:187. doi: 10.3389/fphar.2018.00187 (PMC5844928; doi:10.3389/fphar.2018.00187)
Supplement: Supplementary file 6 [file Table_5.XLSX]

## Sheet: Ingredients
Potential active ingredients in DGLHD
Ingredients	OB (%)	DL	Herbs
(-)-alpha-cedrene	55.56	0.1	SB
(R)-Canadine	55.37	0.77	CC
(S)-Canadine	53.83	0.77	GC
acacetin	34.97	0.24	SB
aeginetic acid	48.31	0.13	RRP
baicalein	33.52	0.21	SB
berberine	36.86	0.78	GC, CC
berberrubine	35.74	0.73	GC, CC
Berlambine	36.68	0.82	CC
beta-sitosterol	36.91	0.75	AG, GC, RR, SB
Bifendate	31.1	0.67	AM
Calycosin	47.75	0.24	AM
Campesterol	37.58	0.71	GC
Carthamidin	41.15	0.24	SB
Catapol	44.69	0.1	RRP
Cavidine	35.64	0.81	GC
Chelerythrine	34.18	0.78	GC
cis-Thujopsene	56.43	0.12	AG
Coptisine	30.67	0.86	GC, CC, SB
Corchoroside A	19.6	0.69	CC
Dehydrotanshinone II A	43.76	0.4	GC
delta 7-stigmastenol	37.42	0.75	GC
Dihydrobaicalin	20.85	0.75	SB
Dihydrooroxylin	38.72	0.23	SB
Diop	43.59	0.39	SB
ent-Epicatechin	48.96	0.24	SB
epiberberine	43.09	0.78	CC, SB
Eriodyctiol (flavanone)	41.35	0.24	SB
Fagarine	72.23	0.15	GC, CC
Ferulic acid	40.43	0.06	AM, AG, GC
formononetin	69.67	0.21	AM
Fumarine	59.26	0.83	GC
hederagenin	36.91	0.75	AM
Hericenone H	39	0.63	GC
Isocorypalmine	35.77	0.59	GC
isorhamnetin	49.6	0.31	AM
Jaranol	50.83	0.29	AM
jioglutin A	90.7	0.13	RRP
jioglutin B	90.71	0.13	RRP
jioglutin D	39.02	0.14	RRP
jioglutin E	81.9	0.1	RRP
kaempferol	41.88	0.24	AM
linolenic acid	45.01	0.15	AM
Linolenic acid methyl ester	46.15	0.17	SB
Magnograndiolide	63.71	0.19	GC, CC
Mairin	55.38	0.78	AM
Methyl palmitelaidate	34.61	0.12	SB
Methyl palmitoleate	34.61	0.12	RRP
Moslosooflavone	44.09	0.25	SB
Neobaicalein	104.34	0.44	SB
N-Methylflindersine	32.36	0.18	GC
Noroxyhydrastinine	38.89	0.1	GC, CC
Norwogonin	39.4	0.21	SB
Oleic acid	33.13	0.14	GC
Oroxylin a	41.37	0.23	SB
Palmatine	64.6	0.65	GC, CC
Panicolin	76.26	0.29	SB
phellamurin	56.6	0.39	GC
Phellavin	3.9	0.83	GC
Phellopterin	40.19	0.28	GC
Ptelein	72.44	0.15	GC
quercetin	46.43	0.28	GC, CC, AM
Rehmaglutin D	57.03	0.1	RR, RRP
rivularin	37.94	0.37	SB
rutaecarpine	40.3	0.6	GC
Salvigenin	49.07	0.33	SB
senkyunolide-D	79.13	0.1	AG
sitosterol	36.91	0.75	RRP, SB
Skimmianin	40.14	0.2	GC
Skullcapflavone II	69.51	0.44	SB
Stigmasterol	43.83	0.76	AG, GC, RRP, SB
thalifendine	44.41	0.73	GC
wogonin	30.68	0.23	SB
Worenine	45.83	0.87	GC, CC
zoomaric acid	35.78	0.1	RRP
β-patchoulene	50.69	0.11	SB

## Sheet: Targets
Potential targets in DGLHD
Ingredients	Targets
(-)-alpha-cedrene	Rxrα
(-)-alpha-cedrene	PTGS2
(-)-alpha-cedrene	NCOA2
(-)-alpha-cedrene	CHRM3
(-)-alpha-cedrene	CHRM1
(-)-alpha-cedrene	GABRA2
(-)-alpha-cedrene	GABRA1
(-)-alpha-cedrene	ADH1C
(-)-alpha-cedrene	ADH1B
(R)-Canadine	SLC6A4
(R)-Canadine	SLC6A2
(R)-Canadine	SLC6A3
(R)-Canadine	SCN5A
(R)-Canadine	Rxrα
(R)-Canadine	PTGS2
(R)-Canadine	PTGS1
(R)-Canadine	KCNH2
(R)-Canadine	OPRM
(R)-Canadine	CHRM5
(R)-Canadine	CHRM4
(R)-Canadine	CHRM3
(R)-Canadine	CHRM2
(R)-Canadine	CHRM1
(R)-Canadine	PRKACA
(R)-Canadine	HSP90
(R)-Canadine	DRD1
(R)-Canadine	OPRD
(R)-Canadine	DRD1B
(R)-Canadine	F10
(R)-Canadine	PDE10A
(R)-Canadine	CaM
(R)-Canadine	KCNMA1
(R)-Canadine	ADRB2
(R)-Canadine	ADRA2C
(R)-Canadine	ADRA1D
(R)-Canadine	ADRA1B
(R)-Canadine	ADRA1A
(R)-Canadine	5-HTR3
(R)-Canadine	HTR2C
(R)-Canadine	HTR2A
(S)-Canadine	SLC6A4
(S)-Canadine	SLC6A3
(S)-Canadine	SCN5A
(S)-Canadine	Rxrβ
(S)-Canadine	Rxrα
(S)-Canadine	PTGS2
(S)-Canadine	PTGS1
(S)-Canadine	KCNH2
(S)-Canadine	OPRM
(S)-Canadine	CHRM5
(S)-Canadine	CHRM4
(S)-Canadine	CHRM3
(S)-Canadine	CHRM2
(S)-Canadine	CHRM1
(S)-Canadine	PRKACA
(S)-Canadine	HSP90
(S)-Canadine	DRD1
(S)-Canadine	OPRD
(S)-Canadine	DRD3
(S)-Canadine	DRD1B
(S)-Canadine	F10
(S)-Canadine	rFVIIa
(S)-Canadine	CaM
(S)-Canadine	ADRB2
(S)-Canadine	ADRA2C
(S)-Canadine	ADRA2B
(S)-Canadine	ADRA1D
(S)-Canadine	ADRA1B
(S)-Canadine	ADRA1A
(S)-Canadine	5-HTR3
(S)-Canadine	HTR2C
(S)-Canadine	HTR2A
Acacetin	Tnfsf6
Acacetin	Trypsin-1
Acacetin	NF-κB p65
Acacetin	CHEK1
Acacetin	PTGS2
Acacetin	PTGS1
Acacetin	PIK3CA
Acacetin	NCOA2
Acacetin	NCOA1
Acacetin	iNOS
Acacetin	PRKACA
Acacetin	HSP90
Acacetin	FAS
Acacetin	DPP4
Acacetin	CYP19A1
Acacetin	CDKN1B
Acacetin	PDE3A
Acacetin	P53
Acacetin	CDK2
Acacetin	Caspase8
Acacetin	Caspase3
Acacetin	CaM
Acacetin	ADRB2
Acacetin	BCL2
Acacetin	BAX
Acacetin	AR
Aeginetic acid	PTGS2
Baicalein	VEGF
Baicalein	TDRD7
Baicalein	Trypsin-1
Baicalein	NF-κB p65
Baicalein	AKT1
Baicalein	c-Fos
Baicalein	PTGS2
Baicalein	PTGS1
Baicalein	PIK3CA
Baicalein	NCOA2
Baicalein	NCOA1
Baicalein	NFATC1
Baicalein	NOX5
Baicalein	MPO
Baicalein	PRKACA
Baicalein	MMP9
Baicalein	IGF2
Baicalein	HIF1α
Baicalein	HSP90
Baicalein	CCNB1
Baicalein	FRA2
Baicalein	FRA1
Baicalein	FABP5
Baicalein	EGLN1
Baicalein	DPP4
Baicalein	CYCS
Baicalein	PDE3A
Baicalein	P53
Baicalein	CDC2
Baicalein	Caspase3
Baicalein	CaM
Baicalein	ALOX5
Baicalein	ALOX12
Baicalein	BCL2
Baicalein	BAX
Baicalein	APOD
Baicalein	AR
Berberine	Trypsin-1
Berberine	SCN5A
Berberine	Rxrα
Berberine	PTGS2
Berberine	PTGS1
Berberine	KCNH2
Berberine	NCOA2
Berberine	eNOS
Berberine	iNOS
Berberine	PRKACA
Berberine	HSP90
Berberine	ER
Berberine	F10
Berberine	PDE10A
Berberine	CaM
Berberine	ADRB2
Berberine	AR
Berberrubine	Trypsin-1
Berberrubine	SCN5A
Berberrubine	Rxrα
Berberrubine	PTGS2
Berberrubine	PTGS1
Berberrubine	KCNH2
Berberrubine	NCOA2
Berberrubine	eNOS
Berberrubine	iNOS
Berberrubine	PRKACA
Berberrubine	ER
Berberrubine	CaM
Berberrubine	AR
Berlambine	Trypsin-1
Berlambine	SCN5A
Berlambine	Rxrα
Berlambine	PTGS2
Berlambine	PTGS1
Berlambine	KCNH2
Berlambine	NCOA2
Berlambine	eNOS
Berlambine	iNOS
Berlambine	CHRM3
Berlambine	PRKACA
Berlambine	HSP90
Berlambine	F10
Berlambine	rFVIIa
Berlambine	CaM
Berlambine	KCNMA1
Berlambine	ADRB2
Berlambine	AR
Berlambine	ADRA1D
Berlambine	ADRA1B
beta-sitosterol	TGF-β1
beta-sitosterol	AP-1
beta-sitosterol	SLC6A4
beta-sitosterol	SCN5A
beta-sitosterol	PON1
beta-sitosterol	PKCα
beta-sitosterol	PTGS2
beta-sitosterol	PTGS1
beta-sitosterol	PR
beta-sitosterol	KCNH2
beta-sitosterol	PIK3CA
beta-sitosterol	NCOA2
beta-sitosterol	CHRNA2
beta-sitosterol	CHRNA7
beta-sitosterol	OPRM
beta-sitosterol	CHRM4
beta-sitosterol	CHRM3
beta-sitosterol	CHRM2
beta-sitosterol	CHRM1
beta-sitosterol	PRKACA
beta-sitosterol	MAP2
beta-sitosterol	HSP90
beta-sitosterol	GABRA5
beta-sitosterol	GABRA3
beta-sitosterol	GABRA2
beta-sitosterol	GABRA1
beta-sitosterol	DRD1
beta-sitosterol	CYP101
beta-sitosterol	PDE3A
beta-sitosterol	Caspase9
beta-sitosterol	Caspase8
beta-sitosterol	Caspase3
beta-sitosterol	ADRB2
beta-sitosterol	BCL2
beta-sitosterol	BAX
beta-sitosterol	ADRA1B
beta-sitosterol	ADRA1A
beta-sitosterol	HTR2A
Bifendate	VEGFR2
Bifendate	PTGS2
Bifendate	PTGS1
Bifendate	HGFR
Bifendate	HSP90
Bifendate	TOP2
Bifendate	KCNMA1
Calycosin	Trypsin-1
Calycosin	CHEK1
Calycosin	Rxrα
Calycosin	PIM1
Calycosin	PTGS2
Calycosin	PTGS1
Calycosin	PPAR gamma
Calycosin	NCOA2
Calycosin	iNOS
Calycosin	PRKACA
Calycosin	MAPK14
Calycosin	HSP90
Calycosin	Gsk3β
Calycosin	ER-β
Calycosin	ER
Calycosin	DPP4
Calycosin	CyclinA2
Calycosin	PDE3A
Calycosin	CDK2
Calycosin	CaM
Calycosin	ADRB2
Calycosin	AR
Campesterol	PR
Carthamidin	PTGS2
Carthamidin	PTGS1
Carthamidin	PRKACA
Carthamidin	HSP90
Catapol	Thrombin
Catapol	eNOS
Catapol	DPP4
Catapol	CA2
Cavidine	SLC6A4
Cavidine	Rxrβ
Cavidine	Rxrα
Cavidine	PTGS2
Cavidine	PTGS1
Cavidine	KCNH2
Cavidine	OPRM
Cavidine	CHRM5
Cavidine	CHRM4
Cavidine	CHRM3
Cavidine	CHRM1
Cavidine	HSP90
Cavidine	DRD1
Cavidine	TOP2
Cavidine	OPRD
Cavidine	F10
Cavidine	rFVIIa
Cavidine	PDE10A
Cavidine	CaM
Cavidine	ADRB2
Cavidine	ADRB1
Cavidine	ADRA2C
Cavidine	ADRA1D
Cavidine	ADRA1B
Cavidine	5-HTR3
Cavidine	HTR2C
Cavidine	HTR2A
Chelerythrine	Rxrα
Chelerythrine	PTGS2
Chelerythrine	KCNH2
Chelerythrine	NCOA2
Chelerythrine	PRKACA
cis-Thujopsene	CHRM3
cis-Thujopsene	CHRM2
Coptisine	Trypsin-1
Coptisine	SCN5A
Coptisine	PTGS2
Coptisine	PTGS1
Coptisine	KCNH2
Coptisine	eNOS
Coptisine	iNOS
Coptisine	ER
Coptisine	AR
Corchoroside A	NCOA2
Corchoroside A	MCR
Dehydrotanshinone II A	Thrombin
Dehydrotanshinone II A	SCN5A
Dehydrotanshinone II A	PTGS2
Dehydrotanshinone II A	PPAR gamma
Dehydrotanshinone II A	NCOA1
Dehydrotanshinone II A	CHRNA7
Dehydrotanshinone II A	OPRM
Dehydrotanshinone II A	CHRM5
Dehydrotanshinone II A	CHRM4
Dehydrotanshinone II A	CHRM3
Dehydrotanshinone II A	CHRM1
Dehydrotanshinone II A	GABRA1
Dehydrotanshinone II A	ER
Dehydrotanshinone II A	DPP4
Dehydrotanshinone II A	OPRD
Dehydrotanshinone II A	ADRB2
Dehydrotanshinone II A	AR
Dehydrotanshinone II A	ADRA1A
Dehydrotanshinone II A	AChE
Dehydrotanshinone II A	HTR2A
delta 7-stigmastenol	PR
Dihydrobaicalin	PTGS2
Dihydrobaicalin	PTGS1
Dihydrobaicalin	PRKACA
Dihydrobaicalin	HSP90
Dihydrooroxylin	SCN5A
Dihydrooroxylin	Rxrα
Dihydrooroxylin	PTGS2
Dihydrooroxylin	PTGS1
Dihydrooroxylin	NCOA1
Dihydrooroxylin	PRKACA
Dihydrooroxylin	HSP90
Dihydrooroxylin	PDE3A
Dihydrooroxylin	CaM
Dihydrooroxylin	ADRB2
Dihydrooroxylin	ADRA1B
Diop	SCN5A
Diop	CHRM3
Diop	ADRB2
ent-Epicatechin	PTGS2
ent-Epicatechin	PTGS1
ent-Epicatechin	PRKACA
ent-Epicatechin	HSP90
ent-Epicatechin	ER
ent-Epicatechin	β-lactamases
Epiberberine	Trypsin-1
Epiberberine	Rxrα
Epiberberine	PTGS2
Epiberberine	KCNH2
Epiberberine	NCOA2
Epiberberine	eNOS
Epiberberine	iNOS
Epiberberine	PRKACA
Epiberberine	ER
Epiberberine	PDE10A
Epiberberine	AR
Eriodyctiol (flavanone)	PTGS2
Eriodyctiol (flavanone)	PTGS1
Eriodyctiol (flavanone)	PIK3CA
Eriodyctiol (flavanone)	NCOA2
Eriodyctiol (flavanone)	PRKACA
Eriodyctiol (flavanone)	HSP90
Eriodyctiol (flavanone)	PYGM
Eriodyctiol (flavanone)	CaM
Fagarine	HSP90
Formononetin	Trypsin-1
Formononetin	AP-1
Formononetin	Thrombin
Formononetin	SLC6A4
Formononetin	SLC6A3
Formononetin	CHEK1
Formononetin	Rxrα
Formononetin	PIM1
Formononetin	PTGS2
Formononetin	PTGS1
Formononetin	PPAR gamma
Formononetin	eNOS
Formononetin	iNOS
Formononetin	MT-ND6
Formononetin	SIRT1
Formononetin	CHRM1
Formononetin	PRKACA
Formononetin	MAPK14
Formononetin	IL4
Formononetin	HSP90
Formononetin	Gsk3β
Formononetin	ER-β
Formononetin	ER
Formononetin	DPP4
Formononetin	CyclinA2
Formononetin	PDE3A
Formononetin	CDK2
Formononetin	PKIA
Formononetin	CaM
Formononetin	β-lactamases
Formononetin	ADRB2
Formononetin	ATP5B
Formononetin	AR
Formononetin	MAOB
Formononetin	ADRA1A
Formononetin	AChE
Formononetin	3β-HSD2
Formononetin	3β-HSD1
Fumarine	CACNA1S
Fumarine	VEGFR2
Fumarine	PDE4
Fumarine	SLC6A4
Fumarine	SLC6A3
Fumarine	SCN5A
Fumarine	PTGS2
Fumarine	PTGS1
Fumarine	KCNH2
Fumarine	OPRM
Fumarine	CHRM5
Fumarine	CHRM4
Fumarine	CHRM3
Fumarine	CHRM1
Fumarine	PRKACA
Fumarine	HSP90
Fumarine	DRD1
Fumarine	TOP2
Fumarine	OPRD
Fumarine	F10
Fumarine	rFVIIa
Fumarine	PDE3A
Fumarine	CaM
Fumarine	ADRB2
Fumarine	ADRA1D
Fumarine	ADRA1B
Fumarine	5-HTR3
Fumarine	HTR2A
Hederagenin	SLC6A2
Hederagenin	SCN5A
Hederagenin	Rxrα
Hederagenin	PTGS2
Hederagenin	PTGS1
Hederagenin	PR
Hederagenin	NCOA2
Hederagenin	CHRM3
Hederagenin	CHRM2
Hederagenin	CHRM1
Hederagenin	Lysozyme
Hederagenin	IGHG1
Hederagenin	GluR2
Hederagenin	GABRA6
Hederagenin	GABRA5
Hederagenin	GABRA3
Hederagenin	GABRA2
Hederagenin	GABRA1
Hederagenin	CYP101
Hederagenin	PDE3A
Hederagenin	ADRA1B
Hederagenin	ADH1C
Hederagenin	ADH1B
Hericenone H	Thrombin
Isocorypalmine	SLC6A4
Isocorypalmine	SLC6A2
Isocorypalmine	SLC6A3
Isocorypalmine	SCN5A
Isocorypalmine	Rxrβ
Isocorypalmine	Rxrα
Isocorypalmine	PTGS2
Isocorypalmine	PTGS1
Isocorypalmine	KCNH2
Isocorypalmine	NCOA1
Isocorypalmine	OPRM
Isocorypalmine	CHRM5
Isocorypalmine	CHRM4
Isocorypalmine	CHRM3
Isocorypalmine	CHRM2
Isocorypalmine	CHRM1
Isocorypalmine	PRKACA
Isocorypalmine	IGHG1
Isocorypalmine	HSP90
Isocorypalmine	DRD1
Isocorypalmine	OPRD
Isocorypalmine	DRD3
Isocorypalmine	DRD1B
Isocorypalmine	F10
Isocorypalmine	CA2
Isocorypalmine	CaM
Isocorypalmine	KCNMA1
Isocorypalmine	ADRB2
Isocorypalmine	ADRA2C
Isocorypalmine	ADRA2B
Isocorypalmine	ADRA1D
Isocorypalmine	ADRA1B
Isocorypalmine	ADRA1A
Isocorypalmine	5-HTR3
Isocorypalmine	HTR2C
Isocorypalmine	HTR2A
Isorhamnetin	XDH
Isorhamnetin	Trypsin-1
Isorhamnetin	NF-κB p65
Isorhamnetin	Thrombin
Isorhamnetin	CHEK1
Isorhamnetin	PIM1
Isorhamnetin	PTGS2
Isorhamnetin	PTGS1
Isorhamnetin	PIK3CA
Isorhamnetin	PPAR gamma
Isorhamnetin	PPAR delta
Isorhamnetin	LOX1
Isorhamnetin	NCOA2
Isorhamnetin	NCOA1
Isorhamnetin	eNOS
Isorhamnetin	iNOS
Isorhamnetin	NCF1
Isorhamnetin	PTPN1
Isorhamnetin	PRKACA
Isorhamnetin	MAPK14
Isorhamnetin	HSP90
Isorhamnetin	Gsk3β
Isorhamnetin	PYGM
Isorhamnetin	GluR2
Isorhamnetin	GABRA1
Isorhamnetin	ER-β
Isorhamnetin	ER
Isorhamnetin	DPP4
Isorhamnetin	CYP101
Isorhamnetin	CyclinA2
Isorhamnetin	rFVIIa
Isorhamnetin	CDK2
Isorhamnetin	CaM
Isorhamnetin	AR
Isorhamnetin	MAOB
Isorhamnetin	ALDR
Isorhamnetin	AChE
Jaranol	Trypsin-1
Jaranol	SCN5A
Jaranol	CHEK1
Jaranol	PTGS2
Jaranol	PTGS1
Jaranol	NCOA2
Jaranol	iNOS
Jaranol	HSP90
Jaranol	ER-β
Jaranol	DPP4
Jaranol	CDK2
Jaranol	CaM
Jaranol	AR
Jioglutin A	GluR2
Jioglutin A	GABRA1
Jioglutin B	GluR2
Jioglutin B	GABRA1
Jioglutin D	PTGS2
Jioglutin D	GluR2
Jioglutin E	PTGS2
Jioglutin E	IGHG1
Jioglutin E	GluR2
Jioglutin E	GABRA6
Jioglutin E	GABRA5
Jioglutin E	GABRA2
Jioglutin E	GABRA1
Kaempferol	XDH
Kaempferol	VAP1
Kaempferol	DIO1
Kaempferol	TNF-α
Kaempferol	Trypsin-1
Kaempferol	NF-κB p65
Kaempferol	AP-1
Kaempferol	Thrombin
Kaempferol	SLC2A4
Kaempferol	SLC6A2
Kaempferol	STAT1
Kaempferol	PP2BA
Kaempferol	AKT1
Kaempferol	PTGS2
Kaempferol	PTGS1
Kaempferol	PR
Kaempferol	PIK3CA
Kaempferol	PPAR gamma
Kaempferol	PRXC1A
Kaempferol	NR1I3
Kaempferol	NR1I2
Kaempferol	NCOA2
Kaempferol	eNOS
Kaempferol	iNOS
Kaempferol	CHRM2
Kaempferol	CHRM1
Kaempferol	PRKACA
Kaempferol	MAPK8
Kaempferol	MMP1
Kaempferol	ICAM1
Kaempferol	IR
Kaempferol	IKBKB
Kaempferol	HAS2
Kaempferol	HO1
Kaempferol	HSP90
Kaempferol	GSTP
Kaempferol	GSTM2
Kaempferol	GSTM1
Kaempferol	GABRA2
Kaempferol	GABRA1
Kaempferol	SELE
Kaempferol	TOP2
Kaempferol	DPP4
Kaempferol	CYP3A4
Kaempferol	CYP1B1
Kaempferol	CYP1A2
Kaempferol	CYP1A1
Kaempferol	rFVIIa
Kaempferol	CDC2
Kaempferol	Caspase3
Kaempferol	CaM
Kaempferol	AHR
Kaempferol	ALOX5
Kaempferol	BCL2
Kaempferol	BAX
Kaempferol	Biotin
Kaempferol	AR
Kaempferol	ADRA1B
Kaempferol	AKR1C3
Kaempferol	AHSA1
Kaempferol	AChE
Kaempferol	PSMD3
Linolenic acid	TRIM26
Linolenic acid	TRPV1
Linolenic acid	NF-κB p65
Linolenic acid	RXRG
Linolenic acid	Rxrα
Linolenic acid	PTGS2
Linolenic acid	PTGS1
Linolenic acid	PCNA
Linolenic acid	NCOA2
Linolenic acid	MYC
Linolenic acid	UCP2
Linolenic acid	HNF4α
Linolenic acid	HNF1α
Linolenic acid	CaM
Linolenic acid	ACTB
Linolenic acid methyl ester	PTGS2
Linolenic acid methyl ester	PTGS1
Magnograndiolide	GluR2
Magnograndiolide	GABRA6
Magnograndiolide	GABRA2
Magnograndiolide	GABRA1
Mairin	PR
Methyl linolelaidate	Rxrα
Methyl linolelaidate	PTGS2
Methyl linolelaidate	PTGS1
Methyl linolelaidate	NCOA2
Methyl palmitelaidate	Rxrα
Methyl palmitelaidate	PTGS2
Methyl palmitelaidate	PTGS1
Methyl palmitelaidate	NCOA2
Methyl palmitoleate	Rxrα
Methyl palmitoleate	PTGS2
Methyl palmitoleate	PTGS1
Methyl palmitoleate	NCOA2
Moslosooflavone	Trypsin-1
Moslosooflavone	Thrombin
Moslosooflavone	SCN5A
Moslosooflavone	CHEK1
Moslosooflavone	Rxrα
Moslosooflavone	PTGS2
Moslosooflavone	PTGS1
Moslosooflavone	PIK3CA
Moslosooflavone	PPAR gamma
Moslosooflavone	NCOA1
Moslosooflavone	iNOS
Moslosooflavone	CHRNA7
Moslosooflavone	PRKACA
Moslosooflavone	MAPK14
Moslosooflavone	HSP90
Moslosooflavone	Gsk3β
Moslosooflavone	GABRA1
Moslosooflavone	ER-β
Moslosooflavone	DPP4
Moslosooflavone	CDK2
Moslosooflavone	CaM
Moslosooflavone	KCNMA1
Moslosooflavone	ADRB2
Moslosooflavone	AR
Moslosooflavone	ADRA1B
Neobaicalein	Trypsin-1
Neobaicalein	Thrombin
Neobaicalein	SCN5A
Neobaicalein	CHEK1
Neobaicalein	PTGS2
Neobaicalein	KCNH2
Neobaicalein	PPAR gamma
Neobaicalein	NCOA2
Neobaicalein	iNOS
Neobaicalein	PTPN1
Neobaicalein	HSP90
Neobaicalein	Gsk3β
Neobaicalein	PYGM
Neobaicalein	ER-β
Neobaicalein	ER
Neobaicalein	TOP2
Neobaicalein	DPP4
Neobaicalein	F10
Neobaicalein	rFVIIa
Neobaicalein	CaM
Neobaicalein	KCNMA1
Neobaicalein	AR
N-Methylflindersine	SLC6A4
N-Methylflindersine	SLC6A2
N-Methylflindersine	SLC6A3
N-Methylflindersine	SCN5A
N-Methylflindersine	Rxrα
N-Methylflindersine	PTGS2
N-Methylflindersine	PTGS1
N-Methylflindersine	eNOS
N-Methylflindersine	iNOS
N-Methylflindersine	CHRNA7
N-Methylflindersine	CHRM5
N-Methylflindersine	CHRM4
N-Methylflindersine	CHRM3
N-Methylflindersine	CHRM2
N-Methylflindersine	CHRM1
N-Methylflindersine	HSP90
N-Methylflindersine	GABRA1
N-Methylflindersine	DRD1
N-Methylflindersine	PDE3A
N-Methylflindersine	ADRB2
N-Methylflindersine	ADRA1B
N-Methylflindersine	ADRA1A
Noroxyhydrastinine	PTGS2
Noroxyhydrastinine	PTGS1
Noroxyhydrastinine	CHRM1
Noroxyhydrastinine	PDE3A
Noroxyhydrastinine	ADRB2
Noroxyhydrastinine	MAOB
Noroxyhydrastinine	ADRΑ2A
Norwogonin	CHEK1
Norwogonin	PTGS2
Norwogonin	PTGS1
Norwogonin	PIK3CA
Norwogonin	PPAR gamma
Norwogonin	iNOS
Norwogonin	PRKACA
Norwogonin	HSP90
Norwogonin	DPP4
Norwogonin	PDE3A
Norwogonin	CDK2
Norwogonin	AR
Oleic acid	uPA
Oleic acid	Trypsin-3
Oleic acid	Tep1
Oleic acid	SODs
Oleic acid	SOAT1
Oleic acid	SLC2A5
Oleic acid	PON1
Oleic acid	RBP2
Oleic acid	Rxrα
Oleic acid	CD340
Oleic acid	PTGS2
Oleic acid	PTGS1
Oleic acid	PAI-1
Oleic acid	PLG
Oleic acid	PPAR gamma
Oleic acid	PPAR delta
Oleic acid	PAM
Oleic acid	PYY
Oleic acid	PDX1
Oleic acid	NCOA2
Oleic acid	GAP-43
Oleic acid	MPO
Oleic acid	UCP3
Oleic acid	UCP2
Oleic acid	Lysozyme
Oleic acid	LPL
Oleic acid	Insulin
Oleic acid	ENPEP
Oleic acid	GCG
Oleic acid	FABP
Oleic acid	ET1
Oleic acid	CYP101
Oleic acid	CRP
Oleic acid	CETP
Oleic acid	CCK
Oleic acid	CRN7
Oleic acid	CITED1
Oleic acid	CAT
Oleic acid	BDNF
Oleic acid	NTRK2
Oleic acid	AHR
Oleic acid	ADH1C
Oleic acid	ADH1B
Oleic acid	ADH1A
Oleic acid	SCD
Oleic acid	HMGCR
Oroxylin a	Trypsin-1
Oroxylin a	SCN5A
Oroxylin a	Rxrα
Oroxylin a	PTGS2
Oroxylin a	PTGS1
Oroxylin a	PIK3CA
Oroxylin a	NCOA2
Oroxylin a	NCOA1
Oroxylin a	iNOS
Oroxylin a	PRKACA
Oroxylin a	IL6
Oroxylin a	HSP90
Oroxylin a	CCNB1
Oroxylin a	DPP4
Oroxylin a	CYP2C9
Oroxylin a	CYP1A2
Oroxylin a	PDE3A
Oroxylin a	CDK7
Oroxylin a	CDC2
Oroxylin a	Caspase3
Oroxylin a	PKIA
Oroxylin a	CaM
Oroxylin a	ADRB2
Oroxylin a	BCL2
Oroxylin a	AR
Oroxylin a	ADRA1B
Palmatine	Trypsin-1
Palmatine	SCN5A
Palmatine	Rxrα
Palmatine	PIM1
Palmatine	PTGS2
Palmatine	PTGS1
Palmatine	KCNH2
Palmatine	NCOA2
Palmatine	eNOS
Palmatine	iNOS
Palmatine	PRKACA
Palmatine	HSP90
Palmatine	ER-β
Palmatine	ER
Palmatine	rFVIIa
Palmatine	CDK2
Palmatine	CaM
Palmatine	ADRB2
Palmatine	AR
Panicolin	Trypsin-1
Panicolin	SCN5A
Panicolin	CHEK1
Panicolin	PTGS2
Panicolin	PTGS1
Panicolin	PIK3CA
Panicolin	NCOA1
Panicolin	iNOS
Panicolin	HSP90
Panicolin	ER-β
Panicolin	DPP4
Panicolin	CDK2
Panicolin	CaM
Panicolin	AR
Patchoulene	CHRM3
Patchoulene	CHRM2
Patchoulene	CHRM1
Patchoulene	GABRA2
Patchoulene	GABRA1
Phellamurin	PTGS2
Phellamurin	NCOA2
Phellamurin	HSP90
Phellamurin	GR
Phellamurin	ER
Phellamurin	TOP2
Phellamurin	F10
Phellamurin	rFVIIa
Phellamurin	PDE3A
Phellamurin	CaM
Phellavin	PTGS2
Phellavin	HSP90
Phellavin	rFVIIa
Phellopterin	Thrombin
Phellopterin	SCN5A
Phellopterin	Rxrα
Phellopterin	PTGS2
Phellopterin	CHRNA7
Phellopterin	CHRM1
Phellopterin	PTPN1
Phellopterin	HSP90
Phellopterin	GABRA1
Phellopterin	DPP4
Phellopterin	ADRB2
Phellopterin	ADRA1B
Ptelein	Rxrα
Ptelein	PTGS2
Ptelein	PRKACA
Ptelein	LTA4H
Ptelein	HSP90
Ptelein	MAOB
Quercetin	XDH
Quercetin	VEGF
Quercetin	VAP1
Quercetin	uPA
Quercetin	DIO1
Quercetin	TNF-α
Quercetin	Trypsin-1
Quercetin	TGF-β1
Quercetin	NF-κB p65
Quercetin	E2F2
Quercetin	E2F1
Quercetin	AP-1
Quercetin	tPA
Quercetin	TF
Quercetin	TM
Quercetin	Thrombin
Quercetin	SODs
Quercetin	MMP3
Quercetin	SLC2A4
Quercetin	SCN5A
Quercetin	STAT1
Quercetin	PON1
Quercetin	CHEK2
Quercetin	RUNX2
Quercetin	Rxrα
Quercetin	RB1
Quercetin	ERBB3
Quercetin	CD340
Quercetin	RASA1
Quercetin	RASSF1
Quercetin	RAF1
Quercetin	AKT1
Quercetin	PSA
Quercetin	c-Fos
Quercetin	PKCβ
Quercetin	PKCα
Quercetin	CBFA2T1
Quercetin	PAP
Quercetin	PTGS2
Quercetin	PTGS1
Quercetin	PGE2
Quercetin	EGF
Quercetin	PCOLCE
Quercetin	HERC5
Quercetin	KCNH2
Quercetin	PARP-1
Quercetin	PAI-1
Quercetin	PIK3CA
Quercetin	PTEN
Quercetin	PPAR gamma
Quercetin	PPAR delta
Quercetin	PRXC1A
Quercetin	OPN
Quercetin	ODC
Quercetin	NR1I3
Quercetin	NR1I2
Quercetin	NCOA2
Quercetin	NFE2L2
Quercetin	eNOS
Quercetin	IKBα
Quercetin	NCF1
Quercetin	POR
Quercetin	NQO1
Quercetin	MPO
Quercetin	MYC
Quercetin	PRKACA
Quercetin	MAPK1
Quercetin	MMP9
Quercetin	MGA
Quercetin	MMP1
Quercetin	IL8
Quercetin	IL6
Quercetin	IL2
Quercetin	IL10
Quercetin	IL1β
Quercetin	IL1α
Quercetin	IRF1
Quercetin	IFNγ
Quercetin	ICAM1
Quercetin	IGFBP3
Quercetin	IGF2
Quercetin	IR
Quercetin	IKBKB
Quercetin	IKBKA
Quercetin	HIF1α
Quercetin	HAS2
Quercetin	NKX3
Quercetin	HK2
Quercetin	HO1
Quercetin	HSP90
Quercetin	HSPB1
Quercetin	HSF1
Quercetin	GSTP
Quercetin	GSTM2
Quercetin	GSTM1
Quercetin	GJA1
Quercetin	GABRA1
Quercetin	CCNB1
Quercetin	CCND1
Quercetin	EIF6
Quercetin	ELK1
Quercetin	EST
Quercetin	SELE
Quercetin	EGFR
Quercetin	DUOX2
Quercetin	TOP2
Quercetin	TOP2A
Quercetin	TOP1
Quercetin	GYRB
Quercetin	DPP4
Quercetin	DCAF5
Quercetin	CYP3A4
Quercetin	CYP1B1
Quercetin	CYP1A2
Quercetin	CYP1A1
Quercetin	CDKN2A
Quercetin	CDKN1B
Quercetin	CXCL2
Quercetin	CXCL11
Quercetin	CXCL10
Quercetin	CRP
Quercetin	COL3A1
Quercetin	COL1A1
Quercetin	F10
Quercetin	rFVIIa
Quercetin	CLDN4
Quercetin	P53
Quercetin	CDC2
Quercetin	CD40
Quercetin	ERBB2
Quercetin	CAV1
Quercetin	CTSD
Quercetin	Caspase9
Quercetin	Caspase8
Quercetin	Caspase3
Quercetin	ADRB2
Quercetin	BCL2L1
Quercetin	BIRC5
Quercetin	ABCG2
Quercetin	AHR
Quercetin	ALOX5
Quercetin	BCL2
Quercetin	BAX
Quercetin	AR
Quercetin	MAOB
Quercetin	ALDR
Quercetin	AHSA1
Quercetin	ACAC
Quercetin	AChE
Quercetin	HSPA5
Quercetin	MMP2
Quercetin	PSMD3
Rehmaglutin D	GABRA1
Rivularin	VEGFR2
Rivularin	Trypsin-1
Rivularin	Thrombin
Rivularin	SCN5A
Rivularin	Rxrα
Rivularin	PTGS2
Rivularin	PTGS1
Rivularin	KCNH2
Rivularin	NCOA2
Rivularin	NCOA1
Rivularin	eNOS
Rivularin	iNOS
Rivularin	HSP90
Rivularin	ER-β
Rivularin	TOP2
Rivularin	DPP4
Rivularin	F10
Rivularin	rFVIIa
Rivularin	CA2
Rivularin	CaM
Rivularin	KCNMA1
Rivularin	AR
Rutaecarpine	TNF-α
Rutaecarpine	SCN5A
Rutaecarpine	CHEK1
Rutaecarpine	Rxrα
Rutaecarpine	PTGS2
Rutaecarpine	PTGS1
Rutaecarpine	PIK3CA
Rutaecarpine	eNOS
Rutaecarpine	PRKACA
Rutaecarpine	MMP9
Rutaecarpine	IL4
Rutaecarpine	CYP3A4
Rutaecarpine	CYP2B6
Rutaecarpine	CYP1A2
Rutaecarpine	F10
Rutaecarpine	AR
Rutaecarpine	MMP2
Rutaecarpine	5-HTR3
Salvigenin	Trypsin-1
Salvigenin	Thrombin
Salvigenin	SCN5A
Salvigenin	Rxrα
Salvigenin	PTGS2
Salvigenin	PTGS1
Salvigenin	NCOA2
Salvigenin	eNOS
Salvigenin	iNOS
Salvigenin	IGHG1
Salvigenin	HSP90
Salvigenin	DPP4
Salvigenin	F10
Salvigenin	rFVIIa
Salvigenin	CaM
Salvigenin	ADRB2
Salvigenin	ADRA1B
Salvigenin	AChE
Senkyunolide-D	PTGS2
Senkyunolide-D	eNOS
Senkyunolide-D	GluR2
Senkyunolide-D	GABRA6
Senkyunolide-D	GABRA1
Sitosterol	PR
Sitosterol	NCOA2
Sitosterol	MCR
Skimmianin	Rxrα
Skimmianin	PIK3CA
Skimmianin	PRKACA
Skimmianin	HSP90
Skimmianin	GABRA1
Skullcapflavone II	CACNL2A
Skullcapflavone II	VEGFR2
Skullcapflavone II	Trypsin-1
Skullcapflavone II	Thrombin
Skullcapflavone II	SCN5A
Skullcapflavone II	PTGS2
Skullcapflavone II	PTGS1
Skullcapflavone II	KCNH2
Skullcapflavone II	NCOA2
Skullcapflavone II	NCOA1
Skullcapflavone II	eNOS
Skullcapflavone II	iNOS
Skullcapflavone II	IGHG1
Skullcapflavone II	HSP90
Skullcapflavone II	TOP2
Skullcapflavone II	DPP4
Skullcapflavone II	F10
Skullcapflavone II	rFVIIa
Skullcapflavone II	CaM
Skullcapflavone II	KCNMA1
Skullcapflavone II	AR
Stigmasterol	uPA
Stigmasterol	SLC6A2
Stigmasterol	SLC6A3
Stigmasterol	SCN5A
Stigmasterol	Rxrα
Stigmasterol	PTGS2
Stigmasterol	PTGS1
Stigmasterol	PR
Stigmasterol	NCOA2
Stigmasterol	NCOA1
Stigmasterol	CHRNA7
Stigmasterol	CHRM3
Stigmasterol	CHRM2
Stigmasterol	CHRM1
Stigmasterol	PRKACA
Stigmasterol	MCR
Stigmasterol	LTA4H
Stigmasterol	IGHG1
Stigmasterol	GABRA3
Stigmasterol	GABRA1
Stigmasterol	CTRB
Stigmasterol	ADRB2
Stigmasterol	ADRB1
Stigmasterol	MAOB
Stigmasterol	MAOA
Stigmasterol	ADRΑ2A
Stigmasterol	ADRA1B
Stigmasterol	ADRA1A
Stigmasterol	ALDR
Stigmasterol	ADH1C
Stigmasterol	HTR2A
Thalifendine	Trypsin-1
Thalifendine	SCN5A
Thalifendine	Rxrα
Thalifendine	PTGS2
Thalifendine	PTGS1
Thalifendine	KCNH2
Thalifendine	NCOA2
Thalifendine	eNOS
Thalifendine	iNOS
Thalifendine	PRKACA
Thalifendine	HSP90
Thalifendine	ER
Thalifendine	CaM
Thalifendine	AR
Wogonin	VEGFR2
Wogonin	TNF-α
Wogonin	Trypsin-1
Wogonin	NF-κB p65
Wogonin	AP-1
Wogonin	Tep1
Wogonin	SCN5A
Wogonin	CHEK1
Wogonin	Rxrα
Wogonin	AKT1
Wogonin	PKCd
Wogonin	PTGS2
Wogonin	PTGS1
Wogonin	PGE2
Wogonin	PIK3CA
Wogonin	PPAR gamma
Wogonin	iNOS
Wogonin	PRKACA
Wogonin	MAPK14
Wogonin	MMP1
Wogonin	IL8
Wogonin	IL6
Wogonin	MCL1
Wogonin	HSP90
Wogonin	Gsk3β
Wogonin	GABRA1
Wogonin	CCND1
Wogonin	FN1
Wogonin	EIF6
Wogonin	ER
Wogonin	DPP4
Wogonin	CDKN1B
Wogonin	PDE3A
Wogonin	P53
Wogonin	CDK2
Wogonin	ERBB2
Wogonin	Caspase9
Wogonin	Caspase3
Wogonin	CaM
Wogonin	ADRB2
Wogonin	BBC3
Wogonin	BCL2
Wogonin	BAX
Wogonin	AR
Wogonin	AHSA1
Worenine	CHEK1
Worenine	PIM1
Worenine	PTGS2
Worenine	PTGS1
Worenine	iNOS
Worenine	ER
Worenine	AR
Zoomaric acid	PTGS2
Zoomaric acid	PTGS1
Zoomaric acid	NCOA2
β-patchoulene	PTGS2
β-patchoulene	NCOA2
β-patchoulene	CHRM3
β-patchoulene	GABRA6
β-patchoulene	GABRA2
β-patchoulene	GABRA1

## Sheet: Degree of targets
Degree of potential targets in DGLHD
Targets	Degree
PTGS2	61
PTGS1	47
HSP90	40
NCOA2	34
Rxrα	33
PRKACA	32
SCN5A	29
CaM	29
AR	26
iNOS	24
ADRB2	24
Trypsin-1	23
GABRA1	21
DPP4	20
KCNH2	18
eNOS	18
CHRM1	16
ADRA1B	16
CHRM3	16
ER	15
rFVIIa	14
PIK3CA	14
F10	14
PDE3A	14
Thrombin	13
CHEK1	12
NCOA1	12
PPAR gamma	11
CDK2	10
CHRM2	10
ER-β	9
TOP2	9
CHRM4	8
PR	8
SLC6A4	8
ADRA1A	8
GABRA2	8
GluR2	8
KCNMA1	8
HTR2A	8
CHRM5	7
OPRM	7
NF-κB p65	7
DRD1	7
SLC6A3	7
BCL2	7
Caspase3	7
5-HTR3	6
Gsk3β	6
SLC6A2	6
IGHG1	6
OPRD	6
ADRA1D	6
AChE	6
MAOB	6
CHRNA7	6
BAX	6
GABRA6	5
PIM1	5
VEGFR2	5
AP-1	5
MAPK14	5
ADRA2C	4
HTR2C	4
TNF-α	4
CYP101	4
CDC2	4
CYP1A2	4
ADH1C	4
AKT1	4
P53	4
PDE10A	4
DRD1B	3
MMP9	3
CYP3A4	3
Caspase9	3
CDKN1B	3
CCNB1	3
PYGM	3
ALOX5	3
ALDR	3
GABRA3	3
ADH1B	3
GABRA5	3
CA2	3
Caspase8	3
PTPN1	3
IL6	3
Rxrβ	3
CyclinA2	3
XDH	3
PON1	3
AHR	3
PPAR delta	3
AHSA1	3
uPA	3
MPO	3
MCR	3
MMP1	3
EIF6	2
GSTP	2
MYC	2
NR1I2	2
HIF1α	2
NR1I3	2
STAT1	2
IGF2	2
CYP1B1	2
CYP1A1	2
c-Fos	2
IKBKB	2
SELE	2
PAI-1	2
ADRΑ2A	2
IL4	2
TGF-β1	2
CCND1	2
CRP	2
PGE2	2
ICAM1	2
CD340	2
HAS2	2
DRD3	2
ADRB1	2
PKCα	2
VEGF	2
PKIA	2
SLC2A4	2
IL8	2
β-lactamases	2
ADRA2B	2
SODs	2
IR	2
Tep1	2
GSTM1	2
DIO1	2
GSTM2	2
NCF1	2
PRXC1A	2
UCP2	2
PSMD3	2
VAP1	2
LTA4H	2
Lysozyme	2
MMP2	2
HO1	2
tPA	1
RASA1	1
POR	1
CTSD	1
CITED1	1
CXCL10	1
EST	1
IFNγ	1
CHEK2	1
CXCL11	1
CACNL2A	1
IGFBP3	1
COL1A1	1
CXCL2	1
ABCG2	1
IKBKA	1
PKCβ	1
APOD	1
FRA1	1
IKBα	1
CACNA1S	1
IL10	1
GCG	1
IL1α	1
SIRT1	1
IL1β	1
HERC5	1
IL2	1
Tnfsf6	1
CYCS	1
Trypsin-3	1
CAT	1
PDX1	1
CYP19A1	1
PKCd	1
CAV1	1
PLG	1
Insulin	1
FAS	1
CBFA2T1	1
Biotin	1
IRF1	1
BIRC5	1
CCK	1
PYY	1
CYP2B6	1
RB1	1
LOX1	1
RXRG	1
LPL	1
GR	1
CYP2C9	1
SLC2A5	1
ACAC	1
SOAT1	1
MAOA	1
HGFR	1
DCAF5	1
TM	1
MAP2	1
HNF1α	1
MAPK1	1
TRPV1	1
ATP5B	1
UCP3	1
MAPK8	1
HSPB1	1
MCL1	1
CETP	1
AKR1C3	1
ET1	1
MGA	1
BDNF	1
CD40	1
FABP	1
BBC3	1
FABP5	1
MMP3	1
PP2BA	1
3β-HSD2	1
FN1	1
DUOX2	1
FRA2	1
MT-ND6	1
PSA	1
E2F1	1
PTEN	1
E2F2	1
ACTB	1
EGF	1
GAP-43	1
EGFR	1
RAF1	1
NFATC1	1
RASSF1	1
NFE2L2	1
RBP2	1
EGLN1	1
RUNX2	1
NKX3	1
GJA1	1
NOX5	1
SCD	1
NQO1	1
ALOX12	1
CDK7	1
CHRNA2	1
ELK1	1
ADH1A	1
NTRK2	1
GYRB	1
ODC	1
CLDN4	1
OPN	1
TDRD7	1
BCL2L1	1
TF	1
ENPEP	1
HK2	1
CDKN2A	1
HMGCR	1
ERBB2	1
TOP1	1
PAM	1
TOP2A	1
PAP	1
TRIM26	1
PARP-1	1
HNF4α	1
PCNA	1
COL3A1	1
PCOLCE	1
CRN7	1
ERBB2	1
HSPA5	1
ERBB3	1
CTRB	1
PDE4	1
3β-HSD1	1
HSF1	1
